# Supplementary material for: Fabrication of ZnO/Red Phosphorus Heterostructure for Effective Photocatalytic H2 Evolution from Water Splitting
Source: MDPI journal article supplement (doi:10.3390/nano8100835), 2018-10-15
Supplement: s1 [file s1]

## Supporting Information

# Fabrication of ZnO/Red Phosphorus Heterostructure for Effective Photocatalytic H<sub>2</sub> Evolution from Water Splitting

Jiaqi Chen, Shaolong Huang, Yaojia Long, Jiahao Wu, Hui Li, Zhao Li, Yu-Jia Zeng \* and Shuangchen Ruan

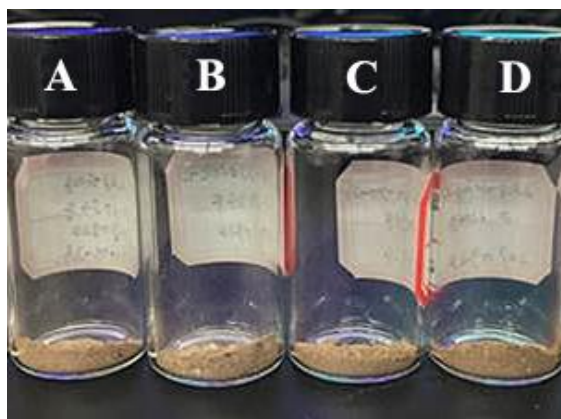

Figure S1. Digital photograph of the heterostructure (A:ZRP-1, B:ZRP-5, C:ZRP-10, D:ZRP-15).

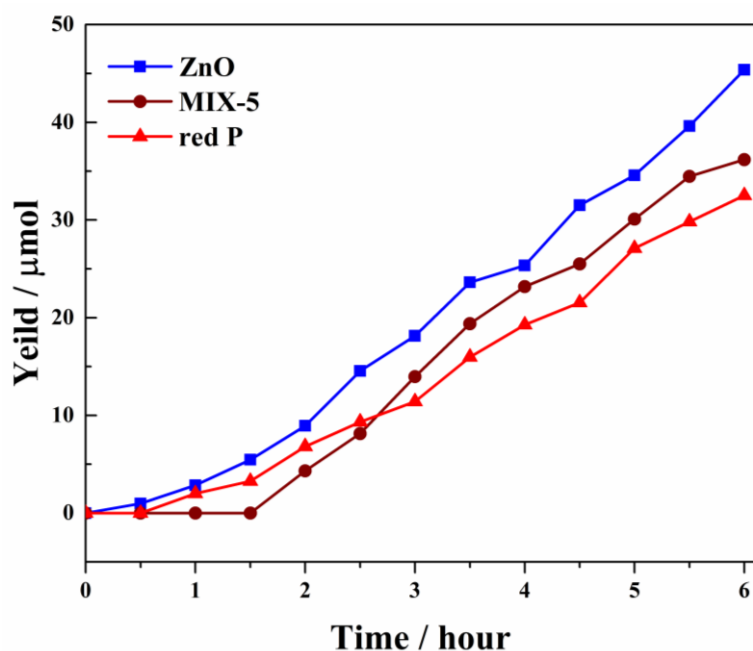

Figure S2. The photocatalytic H<sub>2</sub> production of red P, ZnO, and mechanical mixture (the content of red P is 5%).

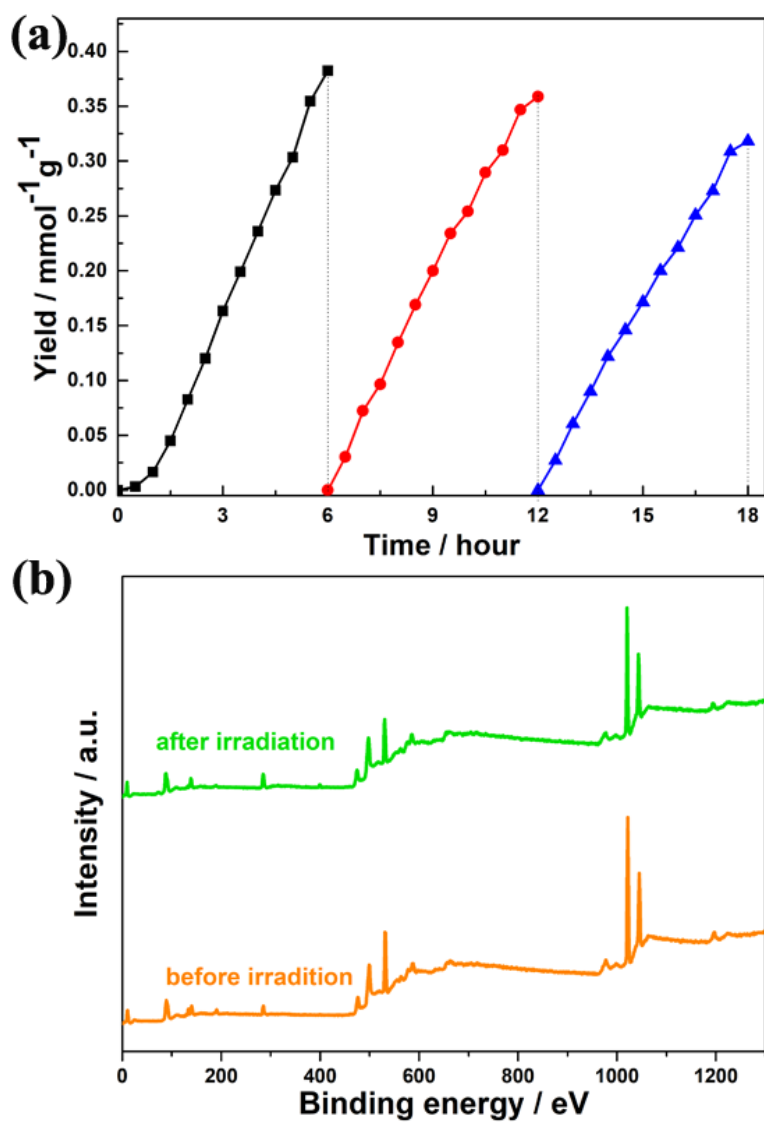

**Figure S3.** (a) The recycling H<sub>2</sub> evolution reaction of ZRP-5 heterojunction. (b) The compared XPS pattern of ZRP-5 before and after irradiation.

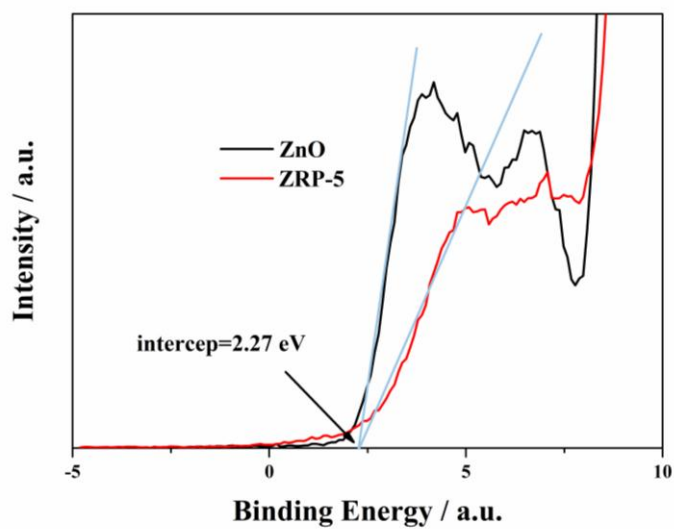

**Figure S4.** The valence band XPS of ZnO and ZRP-5.

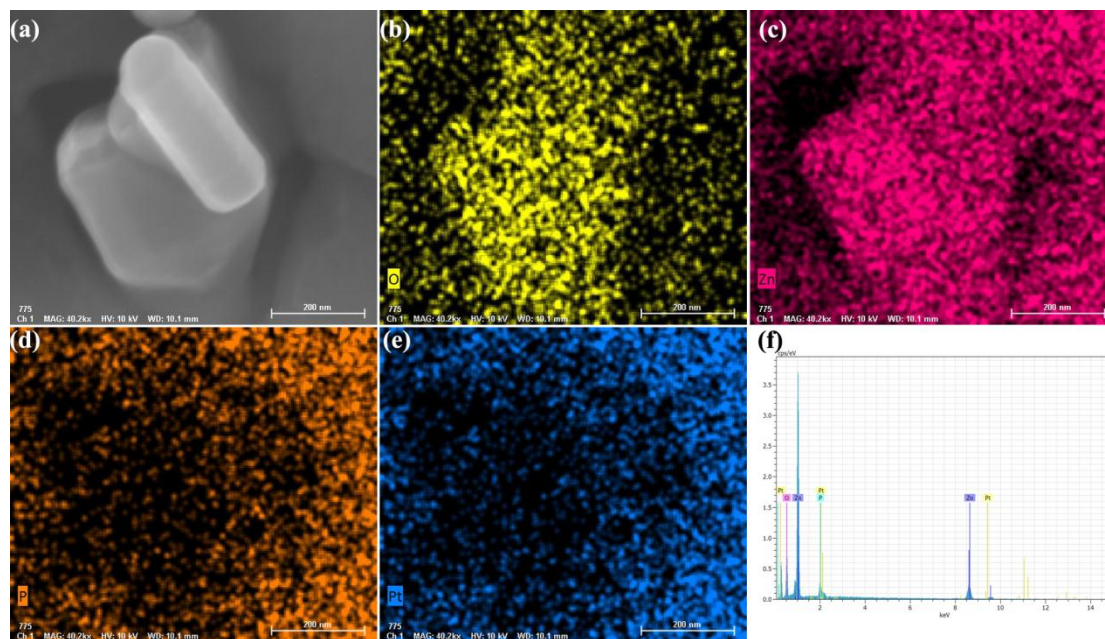

**Figure S5.** (a) SEM image of recycled ZRP-5 sample after water splitting photocatalytic reaction. (b–d) EDS mapping of O, Zn, P and Pt. (f) EDS spectra.

**Table S1.** Specific surface area and pore volume of the samples.

| Samples | Pore volume/cm <sup>3</sup> /g | S <sub>BET</sub> /m <sup>2</sup> /g |
|---------|--------------------------------|-------------------------------------|
| ZnO     | 0.0117 cm <sup>3</sup> /g      | 11.8545 m <sup>2</sup> /g           |
| ZRP-5   | 0.0156 cm <sup>3</sup> /g      | 16.2399 m <sup>2</sup> /g           |
